# Supplementary material
Source: PubMed Central journal article supplement (PMC4573566)
Supplement: NIHMS708889-supplement-Supplemental_Text_and_Figures.pdf [file NIHMS708889-supplement-Supplemental_Text_and_Figures.pdf]

**Supporting information for:**

**Simulating current-voltage relationships for a**

**single-file ion channel using the weighted**

**ensemble method**

Joshua L. Adelman<sup>\*,†</sup> and Michael Grabe<sup>\*,‡</sup>

*Department of Biological Sciences, University of Pittsburgh, Pittsburgh, PA 15206, and  
Cardiovascular Research Institute, Department of Pharmaceutical Chemistry, University of  
California, San Francisco, San Francisco, CA 94158*

E-mail: jla65@pitt.edu; michael.grabe@ucsf.edu

---

\*To whom correspondence should be addressed

†University of Pittsburgh

‡University of California, San Francisco

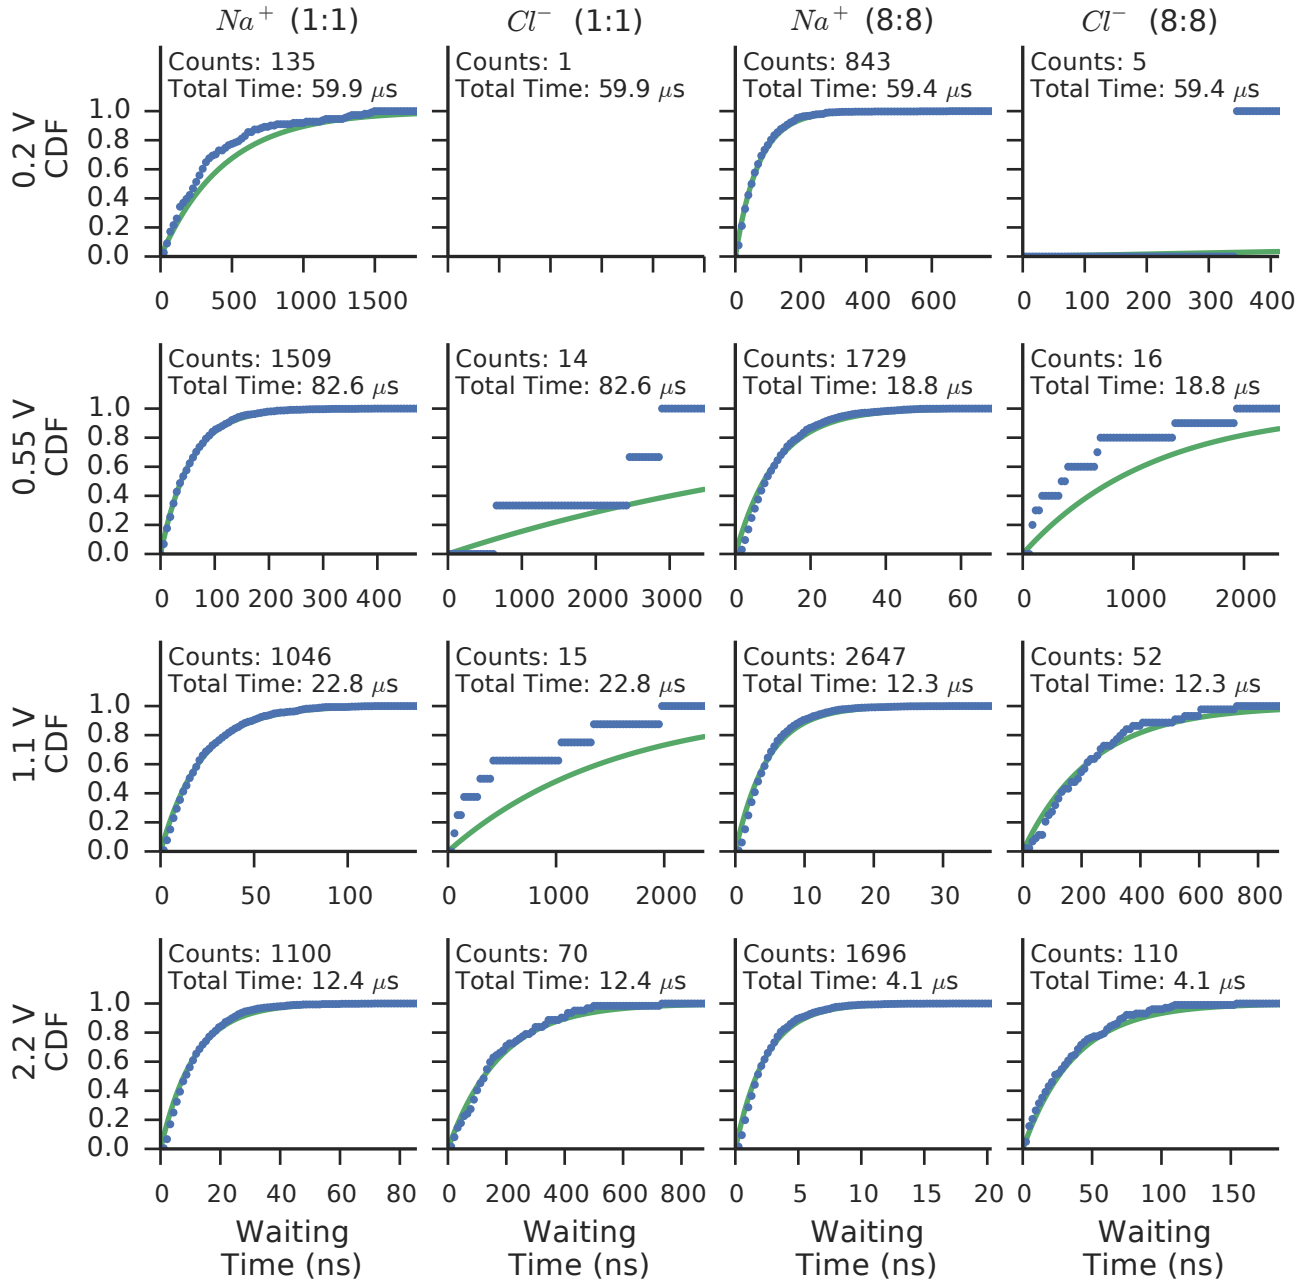

Figure S1: Waiting time distributions from brute force simulations. At each applied voltage, the empirical cumulative distribution function (CDF) for the waiting time between permeation events through the channel observed in the brute force simulations is plotted for the  $\text{Na}^+$  and  $\text{Cl}^-$  ions at both ion concentrations (blue points). The CDF expected from Poisson statistics for a process with characteristic constant,  $\lambda$ , equal to the observed rate is shown as a solid green line. The total number of observed permeation counts and aggregate simulation time noted as inset text.

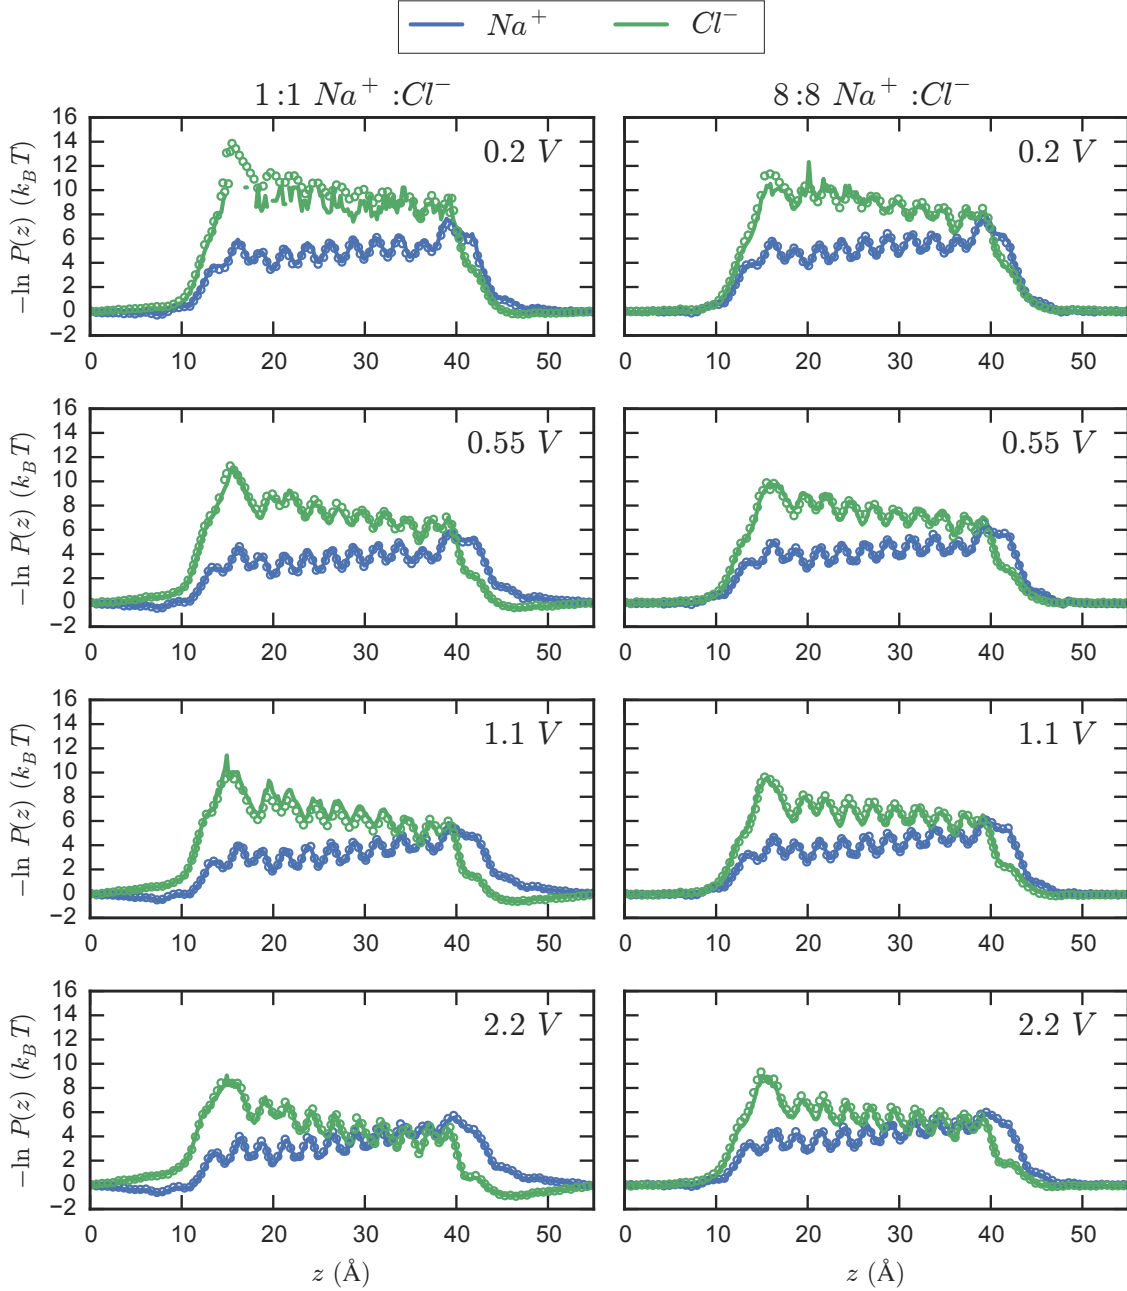

Figure S2: Biased energy profiles for  $\text{Na}^+$  and  $\text{Cl}^-$  as a function of ion position for simulations at all applied voltages calculated from the projection of the steady-state ion distribution onto the  $z$  axis of the simulation box. Profiles calculated from brute force trajectories are shown as solid lines and the open circles show the same profiles as calculated from the corresponding WE simulation. The profiles for the WE simulations are calculated from the final 400 iterations. The left and right column of panels are from simulations with the low and high concentration systems, respectively.

Table S1: Summary of brute force simulations

| Simulation                                        | t (ns)  | Na <sup>+</sup> <sub>up</sub> | Na <sup>+</sup> <sub>down</sub> | Cl <sup>-</sup> <sub>up</sub> | Cl <sup>-</sup> <sub>down</sub> |
|---------------------------------------------------|---------|-------------------------------|---------------------------------|-------------------------------|---------------------------------|
| <b>0.2 V - 1:1 Na<sup>+</sup>:Cl<sup>-</sup></b>  |         |                               |                                 |                               |                                 |
| 1                                                 | 2549.0  | 6                             | 0                               | 0                             | 0                               |
| 2                                                 | 2549.8  | 7                             | 0                               | 0                             | 0                               |
| 3                                                 | 2552.5  | 7                             | 0                               | 0                             | 0                               |
| 4                                                 | 2556.9  | 5                             | 0                               | 0                             | 0                               |
| 5                                                 | 2552.2  | 7                             | 0                               | 0                             | 0                               |
| 6                                                 | 2546.6  | 7                             | 0                               | 0                             | 1                               |
| 7                                                 | 2551.0  | 5                             | 0                               | 0                             | 0                               |
| 8                                                 | 2555.5  | 6                             | 1                               | 0                             | 0                               |
| 9                                                 | 2535.2  | 5                             | 0                               | 0                             | 0                               |
| 10                                                | 2523.7  | 10                            | 0                               | 0                             | 0                               |
| 11                                                | 2279.5  | 1                             | 0                               | 0                             | 0                               |
| 12                                                | 2531.7  | 5                             | 0                               | 0                             | 0                               |
| 13                                                | 2533.5  | 6                             | 0                               | 0                             | 0                               |
| 14                                                | 2537.1  | 5                             | 0                               | 0                             | 0                               |
| 15                                                | 2294.8  | 5                             | 0                               | 0                             | 0                               |
| 16                                                | 2530.2  | 2                             | 0                               | 0                             | 0                               |
| 17                                                | 2535.1  | 4                             | 0                               | 0                             | 0                               |
| 18                                                | 2536.3  | 4                             | 0                               | 0                             | 0                               |
| 19                                                | 2537.4  | 10                            | 0                               | 0                             | 0                               |
| 20                                                | 2297.5  | 6                             | 0                               | 0                             | 0                               |
| 21                                                | 2282.4  | 5                             | 0                               | 0                             | 0                               |
| 22                                                | 2517.2  | 5                             | 0                               | 0                             | 0                               |
| 23                                                | 2531.4  | 7                             | 0                               | 0                             | 0                               |
| 24                                                | 2530.1  | 5                             | 0                               | 0                             | 0                               |
| <b>Total:</b>                                     | 59946.7 | 135                           | 1                               | 0                             | 1                               |
| <b>0.55 V - 1:1 Na<sup>+</sup>:Cl<sup>-</sup></b> |         |                               |                                 |                               |                                 |
| 1                                                 | 5427.4  | 99                            | 0                               | 0                             | 2                               |
| 2                                                 | 5442.5  | 92                            | 0                               | 0                             | 1                               |
| 3                                                 | 5434.0  | 95                            | 0                               | 0                             | 0                               |
| 4                                                 | 5437.7  | 109                           | 0                               | 0                             | 1                               |
| 5                                                 | 5432.8  | 106                           | 0                               | 0                             | 1                               |
| 6                                                 | 5434.6  | 87                            | 0                               | 0                             | 1                               |
| 7                                                 | 5440.4  | 88                            | 0                               | 0                             | 1                               |
| 8                                                 | 5439.2  | 103                           | 0                               | 0                             | 3                               |
| 9                                                 | 2570.6  | 43                            | 0                               | 0                             | 0                               |
| 10                                                | 2570.2  | 46                            | 0                               | 0                             | 1                               |
| 11                                                | 2574.4  | 53                            | 0                               | 0                             | 0                               |
| 12                                                | 2569.3  | 44                            | 0                               | 0                             | 0                               |
| 13                                                | 2572.8  | 41                            | 0                               | 0                             | 1                               |
| 14                                                | 2574.0  | 47                            | 0                               | 0                             | 0                               |
| 15                                                | 2572.3  | 48                            | 0                               | 0                             | 0                               |
| 16                                                | 2573.1  | 44                            | 0                               | 0                             | 1                               |
| 17                                                | 2314.8  | 50                            | 0                               | 0                             | 1                               |
| 18                                                | 2317.4  | 43                            | 0                               | 0                             | 0                               |
| 19                                                | 2321.0  | 38                            | 0                               | 0                             | 0                               |
| 20                                                | 2310.2  | 43                            | 0                               | 0                             | 0                               |
| 21                                                | 2310.1  | 48                            | 0                               | 0                             | 0                               |
| 22                                                | 2312.9  | 49                            | 0                               | 0                             | 0                               |
| 23                                                | 2311.1  | 52                            | 0                               | 0                             | 0                               |

| Simulation                                        | t (ns)  | Na <sup>+</sup> <sub>up</sub> | Na <sup>+</sup> <sub>down</sub> | Cl <sup>-</sup> <sub>up</sub> | Cl <sup>-</sup> <sub>down</sub> |
|---------------------------------------------------|---------|-------------------------------|---------------------------------|-------------------------------|---------------------------------|
| 24                                                | 2318.2  | 41                            | 0                               | 0                             | 0                               |
| <b>Total:</b>                                     | 82581.1 | 1509                          | 0                               | 0                             | 14                              |
| <b>1.1 V - 1:1 Na<sup>+</sup>:Cl<sup>-</sup></b>  |         |                               |                                 |                               |                                 |
| 1                                                 | 2847.5  | 137                           | 0                               | 0                             | 4                               |
| 2                                                 | 2844.7  | 133                           | 0                               | 0                             | 0                               |
| 3                                                 | 2854.6  | 133                           | 0                               | 0                             | 1                               |
| 4                                                 | 2852.8  | 147                           | 0                               | 0                             | 3                               |
| 5                                                 | 2847.5  | 138                           | 0                               | 0                             | 1                               |
| 6                                                 | 2853.4  | 123                           | 0                               | 0                             | 1                               |
| 7                                                 | 2848.9  | 110                           | 0                               | 0                             | 3                               |
| 8                                                 | 2852.6  | 125                           | 0                               | 0                             | 2                               |
| <b>Total:</b>                                     | 22802.0 | 1046                          | 0                               | 0                             | 15                              |
| <b>2.2 V - 1:1 Na<sup>+</sup>:Cl<sup>-</sup></b>  |         |                               |                                 |                               |                                 |
| 1                                                 | 1556.1  | 140                           | 0                               | 0                             | 7                               |
| 2                                                 | 1556.9  | 134                           | 0                               | 0                             | 8                               |
| 3                                                 | 1555.7  | 153                           | 0                               | 0                             | 8                               |
| 4                                                 | 1554.6  | 138                           | 0                               | 0                             | 6                               |
| 5                                                 | 1557.6  | 130                           | 0                               | 0                             | 9                               |
| 6                                                 | 1552.0  | 119                           | 0                               | 0                             | 10                              |
| 7                                                 | 1556.9  | 148                           | 0                               | 0                             | 9                               |
| 8                                                 | 1556.6  | 138                           | 0                               | 0                             | 13                              |
| <b>Total:</b>                                     | 12446.3 | 1100                          | 0                               | 0                             | 70                              |
| <b>0.2 V - 8:8 Na<sup>+</sup>:Cl<sup>-</sup></b>  |         |                               |                                 |                               |                                 |
| 1                                                 | 2529.9  | 35                            | 0                               | 0                             | 1                               |
| 2                                                 | 2530.2  | 39                            | 0                               | 0                             | 0                               |
| 3                                                 | 2277.4  | 31                            | 0                               | 0                             | 0                               |
| 4                                                 | 2536.6  | 24                            | 0                               | 0                             | 0                               |
| 5                                                 | 2535.1  | 40                            | 0                               | 0                             | 0                               |
| 6                                                 | 2533.7  | 41                            | 0                               | 0                             | 0                               |
| 7                                                 | 2532.1  | 29                            | 0                               | 0                             | 0                               |
| 8                                                 | 2529.3  | 35                            | 0                               | 0                             | 0                               |
| 9                                                 | 2266.7  | 36                            | 0                               | 0                             | 2                               |
| 10                                                | 2517.2  | 39                            | 1                               | 0                             | 0                               |
| 11                                                | 2524.8  | 32                            | 0                               | 0                             | 0                               |
| 12                                                | 2518.2  | 35                            | 0                               | 0                             | 0                               |
| 13                                                | 2285.2  | 30                            | 0                               | 0                             | 0                               |
| 14                                                | 2519.0  | 37                            | 0                               | 0                             | 0                               |
| 15                                                | 2273.9  | 30                            | 0                               | 0                             | 0                               |
| 16                                                | 2519.1  | 37                            | 0                               | 0                             | 1                               |
| 17                                                | 2520.9  | 44                            | 0                               | 0                             | 0                               |
| 18                                                | 2519.2  | 29                            | 0                               | 0                             | 0                               |
| 19                                                | 2518.6  | 43                            | 0                               | 0                             | 0                               |
| 20                                                | 2287.0  | 41                            | 0                               | 0                             | 0                               |
| 21                                                | 2520.2  | 32                            | 0                               | 0                             | 0                               |
| 22                                                | 2525.3  | 34                            | 0                               | 0                             | 0                               |
| 23                                                | 2517.2  | 37                            | 0                               | 0                             | 0                               |
| 24                                                | 2514.3  | 33                            | 0                               | 0                             | 1                               |
| <b>Total:</b>                                     | 59351.2 | 843                           | 1                               | 0                             | 5                               |
| <b>0.55 V - 8:8 Na<sup>+</sup>:Cl<sup>-</sup></b> |         |                               |                                 |                               |                                 |
| 1                                                 | 2341.2  | 204                           | 0                               | 0                             | 3                               |
| 2                                                 | 2341.7  | 222                           | 0                               | 0                             | 6                               |
| 3                                                 | 2342.1  | 211                           | 0                               | 0                             | 2                               |
| 4                                                 | 2347.9  | 231                           | 0                               | 0                             | 0                               |

| Simulation                                       | t (ns)  | Na <sup>+</sup> <sub>up</sub> | Na <sup>+</sup> <sub>down</sub> | Cl <sup>-</sup> <sub>up</sub> | Cl <sup>-</sup> <sub>down</sub> |
|--------------------------------------------------|---------|-------------------------------|---------------------------------|-------------------------------|---------------------------------|
| 5                                                | 2343.4  | 199                           | 0                               | 0                             | 1                               |
| 6                                                | 2345.0  | 221                           | 0                               | 0                             | 2                               |
| 7                                                | 2346.5  | 228                           | 0                               | 0                             | 0                               |
| 8                                                | 2344.6  | 213                           | 0                               | 0                             | 2                               |
| <b>Total:</b>                                    | 18752.4 | 1729                          | 0                               | 0                             | 16                              |
| <b>1.1 V - 8:8 Na<sup>+</sup>:Cl<sup>-</sup></b> |         |                               |                                 |                               |                                 |
| 1                                                | 1529.5  | 335                           | 0                               | 0                             | 5                               |
| 2                                                | 1532.7  | 338                           | 0                               | 0                             | 5                               |
| 3                                                | 1533.6  | 328                           | 0                               | 0                             | 6                               |
| 4                                                | 1533.4  | 327                           | 0                               | 0                             | 9                               |
| 5                                                | 1535.2  | 326                           | 0                               | 0                             | 9                               |
| 6                                                | 1534.9  | 319                           | 0                               | 0                             | 4                               |
| 7                                                | 1531.5  | 327                           | 0                               | 0                             | 8                               |
| 8                                                | 1533.1  | 347                           | 0                               | 0                             | 6                               |
| <b>Total:</b>                                    | 12263.8 | 2647                          | 0                               | 0                             | 52                              |
| <b>2.2 V - 8:8 Na<sup>+</sup>:Cl<sup>-</sup></b> |         |                               |                                 |                               |                                 |
| 1                                                | 510.9   | 208                           | 0                               | 0                             | 16                              |
| 2                                                | 510.4   | 204                           | 0                               | 0                             | 12                              |
| 3                                                | 511.6   | 218                           | 0                               | 0                             | 11                              |
| 4                                                | 508.5   | 200                           | 0                               | 0                             | 13                              |
| 5                                                | 510.9   | 214                           | 0                               | 0                             | 19                              |
| 6                                                | 512.4   | 240                           | 0                               | 0                             | 14                              |
| 7                                                | 511.1   | 215                           | 0                               | 0                             | 10                              |
| 8                                                | 510.7   | 197                           | 0                               | 0                             | 15                              |
| <b>Total:</b>                                    | 4086.6  | 1696                          | 0                               | 0                             | 110                             |
